# Supplementary material
Source: ML conference proceedings conference paper supplement (https://openaccess.thecvf.com/content/cvpr_2015/html/Li_A_Geodesic-Preserving_Method_2015_CVPR_paper.html)
Supplement: Supplementary file 1 [file Li_A_Geodesic-Preserving_Method_2015_CVPR_supplemental.pdf]

# A Geodesic-Preserving Method for Image Warping

Dongping Li<sup>1</sup>, Kaiming He<sup>2</sup>, Jian Sun<sup>2</sup>, and Kun Zhou<sup>1</sup>

<sup>1</sup>Zhejiang University, <sup>2</sup>Microsoft Research

## Supplementary Materials

### 0.1. Definitions of the terms

In Eqn.(1) of the main body, the rotation matrix  $R_{\theta,\phi}$  is:

$$Q \begin{bmatrix} 1 & 0 & 0 \\ 0 & \cos \theta & -\sin \theta \\ 0 & \sin \theta & \cos \theta \end{bmatrix} \begin{bmatrix} \cos \phi & 0 & \sin \phi \\ 0 & 1 & 0 \\ -\sin \phi & 0 & \cos \phi \end{bmatrix} Q^T, \quad (1)$$

Here  $Q$  is a  $3 \times 3$  orthogonal matrix in the form  $[\hat{\mathbf{e}}_1, \hat{\mathbf{e}}_2, \hat{\mathbf{n}}]$ , where  $\hat{\mathbf{n}}$  is the normal vector of the plane spanned by  $\hat{\mathbf{p}}_1, \hat{\mathbf{p}}_2$ , and  $\hat{\mathbf{e}}_1, \hat{\mathbf{e}}_2$  are arbitrary two orthogonal vectors that are also orthogonal to  $\hat{\mathbf{n}}$ .

In Eqn.(7) of the main body, the shape-preserving term is [1]:

$$E_S(\mathbf{V}) = \frac{1}{N} \sum_q \|(A_q(A_q^T A_q)^{-1} A_q^T - I)\mathbf{v}_q\|^2, \quad (2)$$

where  $N$  is the quad number,  $q$  is a quad index, and

$$A_q = \begin{bmatrix} \hat{x}_{q,0} & -\hat{y}_{q,0} & 1 & 0 \\ \hat{y}_{q,0} & \hat{x}_{q,0} & 0 & 1 \\ \vdots & \vdots & \vdots & \vdots \\ \hat{x}_{q,3} & -\hat{y}_{q,3} & 1 & 0 \\ \hat{y}_{q,3} & \hat{x}_{q,3} & 0 & 1 \end{bmatrix}, \quad \mathbf{v}_q = \begin{bmatrix} x_{q,0} \\ y_{q,0} \\ \vdots \\ x_{q,3} \\ y_{q,3} \end{bmatrix}. \quad (3)$$

Here  $(x_{q,0}, y_{q,0}), \dots, (x_{q,3}, y_{q,3})$  denote a warped quad, and  $(\hat{x}_{q,0}, \hat{y}_{q,0}), \dots, (\hat{x}_{q,3}, \hat{y}_{q,3})$  the input quad.

### 0.2. Preserving local smoothness of curves

To compare with local-smoothness-preserving, we implement a simple method to minimize the differences of directions of adjacent segments. We replace the geodesic-preserving term with:

$$E_C(\mathbf{V}) = \frac{1}{N_c} \sum_j (\mathbf{e}_j \cdot \mathbf{e}_{j+1} - |\mathbf{e}_j| \cdot |\mathbf{e}_{j+1}|)^2. \quad (4)$$

where  $N_c$  is the number of segments;  $\mathbf{e}_j, \mathbf{e}_{j+1}$  are two adjacent segments on a curve (each represented by the difference of its two endpoints). The adjacent segments are encouraged to have similar directions. We combine this term with the shape and boundary terms

$$E(\mathbf{V}) = \lambda_B E_B(\mathbf{V}) + \lambda_S E_S(\mathbf{V}) + \lambda_C E_C(\mathbf{V}). \quad (5)$$

Here  $\lambda_C = 100$  is the weight of the curvature term. We solve this energy function via the Gauss-Newton method.

## References

- [1] G. Zhang, M. Cheng, S. Hu, and R. Martin. A shape-preserving approach to image resizing. In *Computer Graphics Forum*, pages 1897–1906. Wiley Online Library, 2009.
